# Supplementary material for: Shared Genes of PPARG and NOS2 in Alzheimer’s Disease and Ulcerative Colitis Drive Macrophages and Microglia Polarization: Evidence from Bioinformatics Analysis and Following Validation
Source: MDPI journal article supplement (doi:10.3390/ijms24065651), 2023-03-15
Supplement: s1 [file s1]

**Table S1:** The common KEGG pathways in GSEA. (AD: Alzheimer's disease, UC: ulcerative colitis, NES: Normalized enrichment score)

| Name                                       | AD      |                 | UC      |                 |
|--------------------------------------------|---------|-----------------|---------|-----------------|
|                                            | NES     | <i>p</i> -value | NES     | <i>p</i> -value |
| Alzheimer's disease                        | -2.1231 | 0.0058          | -1.2937 | 0.0440          |
| Parkinson's disease                        | -2.7043 | 0.0049          | -1.6968 | 0.0067          |
| Huntington's disease                       | -2.1745 | 0.0064          | -1.5092 | 0.0081          |
| Proximal tubule bicarbonate reclamation    | -1.7888 | 0.0030          | -2.1557 | 0.0025          |
| Fatty acid metabolism                      | -1.5379 | 0.0201          | -2.2933 | 0.0026          |
| Phenylalanine metabolism                   | -1.5233 | 0.0446          | -1.6494 | 0.0214          |
| Arginine and proline metabolism            | -1.5800 | 0.0175          | -1.4829 | 0.0131          |
| Valine, leucine and isoleucine degradation | -1.9360 | 0.0035          | -2.2834 | 0.0026          |
| Propanoate metabolism                      | -1.8599 | 0.0033          | -1.9949 | 0.0025          |
| Butanoate metabolism                       | -1.9201 | 0.0033          | -2.4480 | 0.0026          |
| Glycolysis / Gluconeogenesis               | -1.9994 | 0.0039          | -1.6301 | 0.0084          |
| Citrate cycle (TCA cycle)                  | -2.4680 | 0.0033          | -2.1491 | 0.0026          |
| Pyruvate metabolism                        | -2.5069 | 0.0034          | -1.8547 | 0.0026          |
| Oxidative phosphorylation                  | -2.6150 | 0.0049          | -1.7364 | 0.0033          |
| Terpenoid backbone biosynthesis            | -1.9627 | 0.0027          | -2.0150 | 0.0023          |
| Oocyte meiosis                             | -1.3805 | 0.0341          | -1.5399 | 0.0132          |
| Peroxisome                                 | -1.3778 | 0.0385          | -1.7893 | 0.0064          |
| Cytokine-cytokine receptor interaction     | 1.8388  | 0.0011          | 2.2462  | 0.0012          |
| Hematopoietic cell lineage                 | 1.5280  | 0.0089          | 1.7906  | 0.0014          |
| Natural killer cell mediated cytotoxicity  | 1.3577  | 0.0343          | 1.4454  | 0.0150          |
| Jak-STAT signaling pathway                 | 1.6210  | 0.0024          | 1.4841  | 0.0027          |

**Table S2:** Sores of disease activity index (DAI) of colitis

| Feature              | Score | Description                  |
|----------------------|-------|------------------------------|
| Body weight loss     | 0     | 0%                           |
|                      | 1     | 1–5%                         |
|                      | 2     | 6–10%                        |
|                      | 3     | 11–15%                       |
|                      | 4     | >15%                         |
| Feces status         | 0     | Normal                       |
|                      | 2     | Loose stools                 |
|                      | 4     | Watery stool                 |
| Occult/Bloody stools | 0     | Normal                       |
|                      | 2     | Hemoccult positive           |
|                      | 4     | Hematochezia with naked eyes |

**Table S3:** qPCR primer name and sequence

| Gene Name       | Primers (5'–3')                                        |
|-----------------|--------------------------------------------------------|
| <i>Pparg</i>    | F: TCGCTGATGCACTGCCTATG<br>R: GAGAGGTCCACAGAGCTGATT    |
| <i>Nos2</i>     | F: GTTCTCAGCCCAACAATACAAGA<br>R: GTGGACGGGTCGATGTCAC   |
| <i>Cxcl1</i>    | F: CTGGGATTACCTCAAGAACATC<br>R: CAGGGTCAAGGCAAGCCTC    |
| <i>Sele</i>     | F: ATGCCTCGCGCTTTCTCTC<br>R: GTAGTCCCGCTGACAGTATGC     |
| <i>Hsp90ab1</i> | F: GTCCGCCGTGTGTTTCATCAT<br>R: GCACTTCTTGACGATGTTCTTGC |
| <i>β-actin</i>  | F: GGCTGTATTCCCCTCCATCG<br>R: CCAGTTGGTAACAATGCCATGT   |

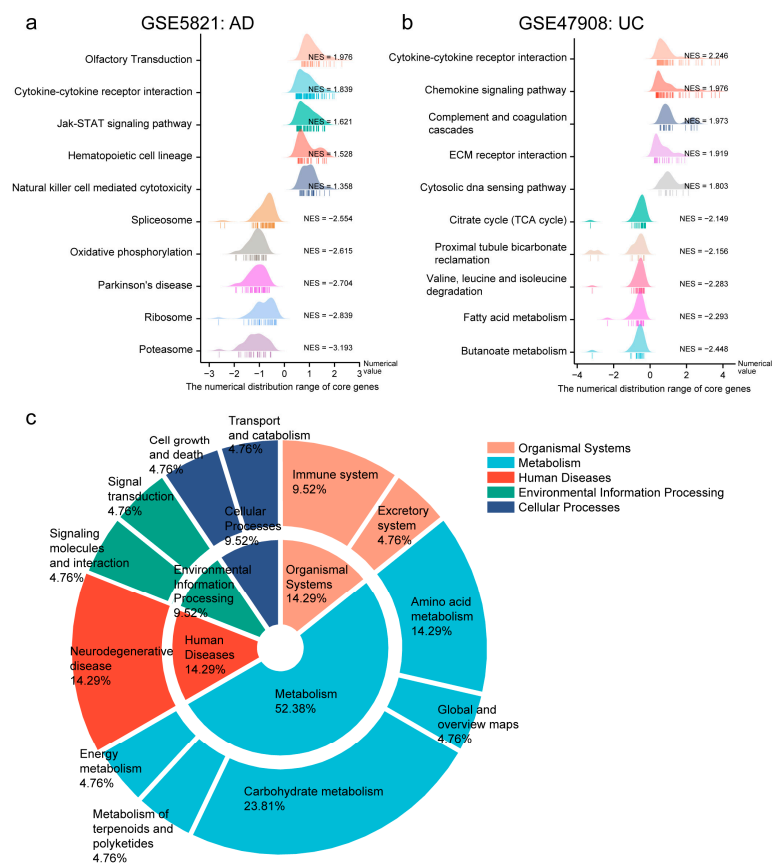

**Figure S1.** GSEA for the sample with GSE5281 (AD) and GSE47908 (UC). **(a)** The enriched gene sets in KEGG collection by GSE5281 (AD). **(b)** The enriched gene sets in KEGG collection by GSE47908 (UC). **(c)** The pie chart shows the proportion of different classes of KEGG pathway enriched in both GSE5281 (AD) and GSE47908 (UC). Only gene sets with  $P < 0.05$  were considered significant. And only several leading gene sets were displayed in the plot. NES: Normalized enrichment score.

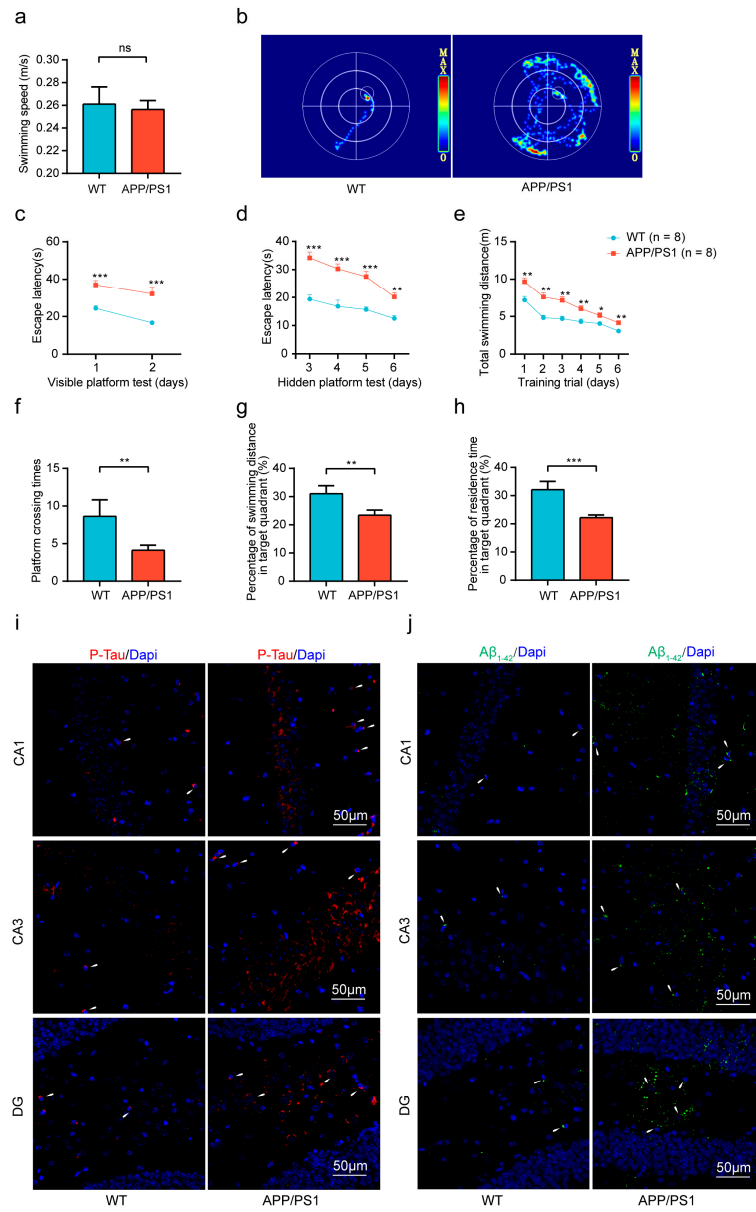

**Figure S2.** Establishment of the AD model mice via APP/PS1 mice. **(a)** Swimming speed. **(b)** Trajectory heat maps of the mice in the MWM test. **(c)** Escape latency in visible platform test. **(d)** Escape latency in hidden platform test. **(e)** Total swimming distance in training trial. **(f)** Times of crossing the platform in space exploration test. **(g)** Percentage of swimming distance in the target quadrant in space exploration test. **(h)** Percentage of residence time in the target quadrant in space exploration test. Data are shown as mean  $\pm$  SD.  $n = 8$  in each group. ns, no significance; \*  $P < 0.05$ , \*\*  $P < 0.01$ , \*\*\*  $P < 0.001$  (Independent samples t-tests and Mann-Whitney U tests). **(i)** P-tau was stained with WT and APP/PS1 groups (magnification $\times 200$ ,  $n = 3$ , red expresses P-tau<sup>+</sup> cells and blue expresses Dapi. The white arrow expresses P-tau<sup>+</sup> cells.). **(j)** Aβ<sub>1-42</sub> were stained with WT and APP/PS1 groups (magnification $\times 200$ ,  $n = 3$ , green expresses Aβ<sub>1-42</sub><sup>+</sup> cells and blue expresses Dapi. The white arrow expresses Aβ<sub>1-42</sub><sup>+</sup> cells.).

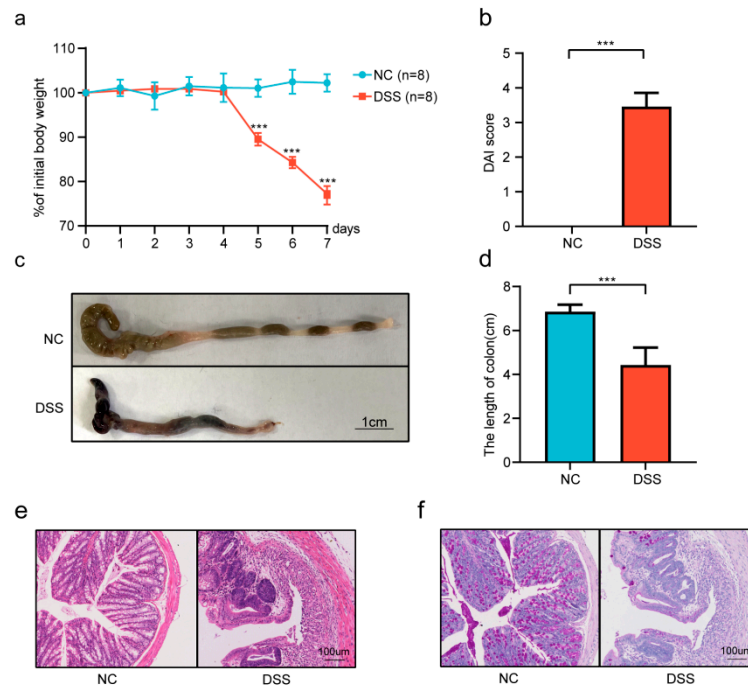

**Figure S3.** Establishment of the UC model mice via DSS-induced mice. **(a)** Bodyweight changes. **(b)** DAI score. **(c)** Representative images of colonic segments. **(d)** Colonic length. Data are shown as mean  $\pm$  SD.  $n = 8$  in each group. \*\*\*  $P < 0.001$  (Independent samples  $t$ -tests). **(e)** HE staining in the colon tissues (magnification $\times 200$ ,  $n = 3$ ). **(f)** PAS staining in the colon tissues (magnification $\times 200$ ,  $n = 3$ ).
